# Supplementary material for: Effect of annealing temperature on the structure of carbon encapsulated Fe3O4 nanospheres
Source: Royal Society of Chemistry journal article supplement (doi:10.1039/c5ra19326e), 2015-01-01
Supplement: c5ra19326e1.pdf [file c5ra19326e1.pdf]

## Supporting Information

### Effect of annealing temperature on structure of carbon encapsulated Fe<sub>3</sub>O<sub>4</sub> nanospheres

WeiPing Shi,<sup>a,b</sup> WeiFeng Liu,<sup>a,c</sup> Lin Chen,<sup>a,c</sup> Lei Qin,<sup>a,b</sup> Yong Zhen Yang<sup>\*a,c</sup> and Xu Guang Liu<sup>\*a,b</sup>

<sup>a</sup> Key Laboratory of Interface Science and Engineering in Advanced Materials (Taiyuan University of Technology), Ministry of Education, Taiyuan 030024, China

<sup>b</sup> College of Chemistry and Chemical Engineering, Taiyuan University of Technology, Taiyuan 030024, China

<sup>c</sup> Research Center on Advanced Materials Science and Technology, Taiyuan University of Technology, Taiyuan 030024, Shanxi, China

Fig.S1 presents representative SEM and TEM images of Fe<sub>3</sub>O<sub>4</sub>@C-5 with different heating rate of 50, 25 and 10°C/min. According to Fig.S1, the average diameters of the three samples are 110, 108 and 109 nm, respectively. And the thicknesses of the carbon layers are about 13, 14 and 13 nm. There is little difference for the average diameter, carbon layer thickness and microstructure between these three resultants. Thus, it can be speculated that the heating rate discussed in our work has hardly obvious effect on the morphology and structure of Fe<sub>3</sub>O<sub>4</sub>@C nanospheres. Therefore, we chose heating rate 50°C/min for further experiments.

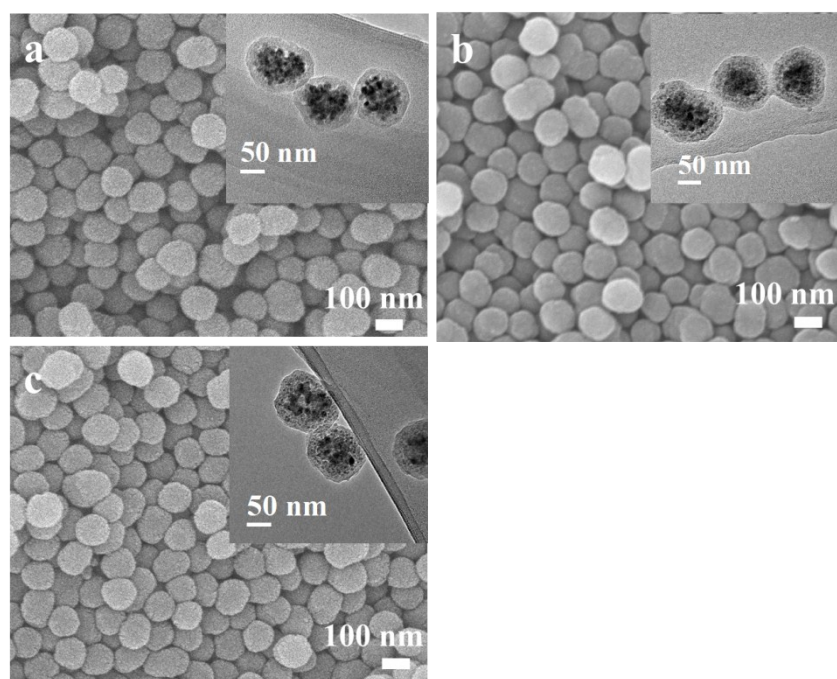

Fig.S1 SEM and TEM images of Fe<sub>3</sub>O<sub>4</sub>@C-5 with heating rate of (a) 50, (b) 25 and (c) 10°C/min.
